# Supplementary material for: Genome Evolution of Filamentous Cyanobacterium Nostoc Species: From Facultative Symbiosis to Free Living
Source: MDPI journal article supplement (doi:10.3390/microorganisms9102015), 2021-09-23
Supplement: s1 [file s1]

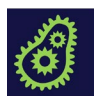

Table S1. Morphological description of the sequencing strains.

| Sequencing Strains                            | Morphological Description                                                                                                                                                                                                                                                                                                                                                                                                                                                                                                                                                                              |
|-----------------------------------------------|--------------------------------------------------------------------------------------------------------------------------------------------------------------------------------------------------------------------------------------------------------------------------------------------------------------------------------------------------------------------------------------------------------------------------------------------------------------------------------------------------------------------------------------------------------------------------------------------------------|
| <b><i>Nostoc sphaeroides</i> CHAB2801</b>     | Colonies are spherical, soft, colloid, with smooth surface and solid periphery. Solitary colonies are usually up to 1–4 cm in diameter. Filaments flexuous, irregularly aggregated. Vegetative cells are short barrel-shaped or nearly spherical, about 4.55 µm long and about 4.7 µm wide, terminal cells often slightly elongated and narrowed up to 2.5 µm. Heterocytes are nearly spherical, 6.2–7.3 µm in length and 5.4–6.6 µm in width. The akinetes cell wall is smooth and spherical.                                                                                                         |
| <b><i>Minunostoc cylindricum</i> CHAB5844</b> | Colonies macroscopic, gelatinous, irregularly clustered, free-living on wet rocky wall in the form of irregular, amorphous, blue–green gelatinous clusters. Filaments flexuous, freely entangled. Sheath usually present, colourless. Vegetative cells barrel-shaped, 3.1– (4.3)–5.4 µm long, 2.5– (3.2)–3.8 µm wide, length: width ratio 1.3. Heterocytes and akinetes were not observed.                                                                                                                                                                                                             |
| <b><i>Nostoc</i> sp. XA013</b>                | Colonies microscopic. In the early stage of life, the filaments were very densely aggregated, could not be seen clearly. In the later stage, the filaments arranged loosely, and the filament broke up into short filaments, and then the spheres burst to release shorter filaments. The end cells of filaments are longer than wide, 2.26–3.34 µm in length, short-barrel to long-barrel vegetative cells, 1.46–2.15–2.80 µm in length and 2.07–2.42–2.80 µm in width. Heterocytes are short barrel-shaped, larger than vegetative cells, about 3.97 µm long and 4.47 µm wide. No akinete was found. |
| <b><i>Nostoc</i> sp. XA010</b>                | Colonies are gelatinous, irregularly clustered. Filaments are usually enveloped by gelatinous sheath. Vegetative cells are short barrel-shaped, 3.15 µm long and 3.51 µm wide. Heterocytes are larger than vegetative cells, long barrel-shaped, 4.81 µm long and 4.34 µm wide. No akinete was found.                                                                                                                                                                                                                                                                                                  |
| <b><i>Nostoc</i> sp. CHAB5714</b>             | Several small spherical colonies are enveloped by a large colony, and the large colony surface are smooth with firm periderm. Filaments are densely entangled especially in young colonies. Vegetative cells are short barrel-shaped to nearly spherical, or long oval, about 3.09 µm in length and 4.43 µm in width. Heterocytes are nearly spherical, similar in size to vegetative cells, with a diameter of 4.3 µm. No akinete was observed.                                                                                                                                                       |
| <b><i>Nostoc</i> sp. CHAB5715</b>             | Colonies are spherical, microscopic. In the early stage of life, small colonies are aggregated into a long filamentous colony. Old colony are solitary. Trichome are enveloped by a thick, colorless sheath. Vegetative cells are short barrel-shaped, 4.19 µm long and 5.29 µm wide. Heterocytes are nearly spherical, slightly larger than vegetative cells, with a diameter of 5.99 µm. No akinete was observed.                                                                                                                                                                                    |
| <b><i>Nostoc</i> sp. CHAB5784</b>             | Colonies are spherical, microscopic. Young colonies are connected with each other by the heterocyte, filaments are densely entangled in colonies. Single trichome are enveloped by sheath or not. Vegetative cells are oval or spherical, about 3.36 µm in length and 3.50 µm in width, and the ratio of length to width is 0.96. Heterocytes are slightly larger than vegetative cells, usually short barrel-shaped, about 3.89 µm in length and 4.06 µm in width. No akinete was observed.                                                                                                           |
| <b><i>Nostoc</i> sp. CHAB5836</b>             | In young colonies, filaments are closely wound, filaments adhere to the firm sheath, and then to form a large spherical colony. The vegetative cells of a single filament are cylindrical, and the vegetative cells in the colony are short barrel-shaped, 3.48 µm long and 3.68 µm wide. Heterocytes are larger than vegetative cells, nearly spherical or short barrel-shaped, 4.10 µm long and 4.50 µm wide, with a length-width ratio of 0.91. No akinete was observed.                                                                                                                            |
| <b><i>Nostoc</i> sp. CHAB5824</b>             | Colonies are spherical, microscopic. heterocyte are at both end of the young, oval colony. Filaments are densely entangled in colonies. Vegetative cells are oval, 1.82–4.11–5.14 µm long and 1.82–2.56–3.58 µm wide. Heterocytes and vegetative cells are similar in size, short barrel-shaped, 2.44–3.04–3.95 µm long and 2.33–2.99–3.73 µm wide. No akinete was observed.                                                                                                                                                                                                                           |
| <b><i>Nostoc</i> sp. CHAB5834</b>             | Colonies are spherical, macroscopic, with loose and irregular filaments. Vegetative cells are spherical to short barrel-shaped, 1.77–2.35–2.95 µm long and 2.03–2.63–3.43 µm wide; heterocytic,                                                                                                                                                                                                                                                                                                                                                                                                        |

spherical or long elliptic, slightly larger than vegetative cells, about 3.58  $\mu\text{m}$  in length and 3.66  $\mu\text{m}$  in width, no akinete was observed.

**Table S2.** Genome assembly and binning results.

| Organism name                          | Length    | Contigs | GC (%) | Proteins | Completeness | Contamination |
|----------------------------------------|-----------|---------|--------|----------|--------------|---------------|
| <i>N. favosum</i> CHAB5714             | 8,514,377 | 245     | 42.28  | 9637     | 100          | 1.89          |
| <i>N. exigua</i> CHAB5715              | 7,054,926 | 1201    | 42.52  | 9732     | 87.62        | 3.41          |
| <i>N. mirabile</i> CHAB5784            | 9,892,412 | 297     | 42.18  | 11341    | 99.92        | 4.19          |
| <i>N. tenue</i> CHAB5824               | 8,117,724 | 138     | 42.27  | 8296     | 99.7         | 2.42          |
| <i>N. rigida</i> CHAB5834              | 9,307,052 | 563     | 43.22  | 10676    | 100          | 7.82          |
| <i>N. pachydermaticum</i> CHAB5836     | 7,461,718 | 384     | 42.55  | 8549     | 99.11        | 2.78          |
| <i>N. minutum</i> XA010                | 8,210,661 | 137     | 41.80  | 8536     | 100          | 1.56          |
| <i>N. xinjiangensis</i> XA013          | 8,483,714 | 211     | 41.71  | 8865     | 100          | 6.9           |
| <i>N. sphaeroides</i> CHAB2801         | 9,217,956 | 11      | 41.45  | 10585    | Complete     | Complete      |
| <i>Minunostoc cylindricum</i> CHAB5844 | 7,868,568 | 208     | 41.40  | 8248     | 99.04        | 1.41          |

**Table S3.** Basic information of downloaded sequences in this research.

| Organism name                    | GenBank number | Length     | contigs | GC (%) | Proteins | Completeness | Contamination |
|----------------------------------|----------------|------------|---------|--------|----------|--------------|---------------|
| <i>N.sp.</i> 213                 | 1168001        | 8,331,440  | 380     | 41.4   | 7021     | 99           | 0.74          |
| <i>N.sp.</i> 232                 | 1167991        | 9,158,766  | 398     | 41.6   | 8097     | 98.78        | 1.37          |
| <i>N. commune</i> NIES-4072      | 1693891        | 8,198,700  | 44      | 41.40  | 7489     | 99.77        | 0.22          |
| <i>N.sp.</i> ATCC 53789          | 1822731        | 8,536,834  | 220     | 41.32  | 7370     | 99.56        | 0.44          |
| <i>N. calicicola</i> FACHB-389   | 916171         | 9,049,214  | 354     | 41.5   | 7401     | 99.22        | 1.11          |
| <i>N. piscinale</i> CENA21       | 488611         | 7,094,556  | 11      | 40.5   | 6172     | 96.99        | 0.44          |
| <i>N.sp.</i> PCC 7120            | 31208          | 7,211,789  | 7       | 41.32  | 6931     | 99.19        | 0             |
| <i>N.sp.</i> PCC 7107            | 502788         | 6,329,823  | 1       | 41.32  | 5456     | 99.26        | 0.33          |
| <i>N.sp.</i> PCC 7524            | 502768         | 6,718,869  | 3       | 41.32  | 5655     | 99.33        | 0             |
| <i>N.sp.</i> CENA543             | 1532881        | 7,207,640  | 6       | 41.32  | 6329     | 99.78        | 0.22          |
| <i>N.sp.</i> 5183                | 1592541        | 7,339,908  | 5       | 41.32  | 6769     | 99.55        | 0.44          |
| <i>N. linckia</i> NIES-25        | 1232421        | 8,590,040  | 21      | 41     | 7042     | 99.89        | 0.89          |
| <i>N.sp.</i> NIES-2111           | 1232511        | 7,876,755  | 11      | 41.32  | 7945     | 99.3         | 0.11          |
| <i>N.sp.</i> KVJ20               | 786451         | 9,184,886  | 425     | 41.32  | 7813     | 99.67        | 0.89          |
| <i>N.sp.</i> 210A                | 1168011        | 8,325,913  | 73      | 41.32  | 7130     | 99.22        | 1.33          |
| <i>N.sp.</i> NIES-3756           | 635661         | 6,987,571  | 3       | 41.32  | 6451     | 99.3         | 0.11          |
| <i>N.sp.</i> DB3992              | 1368581        | 8,521,473  | 1,037   | 41.32  | 7860     | 94.54        | 4.6           |
| <i>N.sp.</i> RF31Y               | 1110281        | 9,205,737  | 629     | 42     | 7759     | 99.11        | 2.61          |
| <i>N. cycadae</i> WK-1           | 1533001        | 6,994,461  | 150     | 40.6   | 5803     | 99.56        | 0.89          |
| <i>N.sp.</i> NIES-4103           | 1232571        | 8,590,607  | 50      | 41.18  | 6994     | 99.26        | 0.44          |
| <i>N. carneum</i> NIES-2107      | 1232481        | 9,359,223  | 16      | 40.70  | 7541     | 99.33        | 0.19          |
| <i>N.sp.</i> 106C                | 1110051        | 8,662,725  | 241     | 41.3   | 7184     | 99.11        | 1.44          |
| <i>N.sp.</i> T09                 | 1110041        | 8,251,853  | 314     | 41.32  | 6969     | 99.11        | 0.33          |
| <i>N. punctiforme</i> PCC73102   | 41068          | 9,059,191  | 6       | 41.42  | 7548     | 99.56        | 0.44          |
| <i>N. sphaeroides</i> Kutzing En | 1912231        | 6,684,490  | 5       | 41.58  | 5998     | 99.48        | 0             |
| <i>N.sp.</i> N6                  | 1592491        | 8,898,590  | 11      | 41.32  | 8353     | 99.44        | 1.19          |
| <i>N. flagelliforme</i> CCNUN1   | 1460651        | 10,231,233 | 9       | 41.84  | 9655     | 100          | 3.07          |

**Table S4.** The genes present in the genome of the NSS closest common ancestor but missing in the previous ancestor.

| Gene Name         | COG | Function                                                                                                                                                                                                                                                                                                                                                                                                                                                                                                                                             |
|-------------------|-----|------------------------------------------------------------------------------------------------------------------------------------------------------------------------------------------------------------------------------------------------------------------------------------------------------------------------------------------------------------------------------------------------------------------------------------------------------------------------------------------------------------------------------------------------------|
| <i>alkB</i>       | L   | Alkylated DNA repair protein                                                                                                                                                                                                                                                                                                                                                                                                                                                                                                                         |
| <i>ALL0363</i>    | L   | Transposase                                                                                                                                                                                                                                                                                                                                                                                                                                                                                                                                          |
| <i>RC1_0998</i>   | L   | Transposase                                                                                                                                                                                                                                                                                                                                                                                                                                                                                                                                          |
| <i>AVA_2181</i>   | L   | Inherit from COG: transposase                                                                                                                                                                                                                                                                                                                                                                                                                                                                                                                        |
| <i>pre</i>        | S   | plasmid recombination enzyme                                                                                                                                                                                                                                                                                                                                                                                                                                                                                                                         |
| <i>wzm</i>        | V   | Transporter                                                                                                                                                                                                                                                                                                                                                                                                                                                                                                                                          |
| <i>PLAV_1218</i>  | S   | methylase helicase                                                                                                                                                                                                                                                                                                                                                                                                                                                                                                                                   |
| <i>BSL1696</i>    | S   | WGR domain-containing protein                                                                                                                                                                                                                                                                                                                                                                                                                                                                                                                        |
| <i>nifV</i>       | E   | Homocitrate synthase                                                                                                                                                                                                                                                                                                                                                                                                                                                                                                                                 |
| <i>psaB</i>       | C   | PsaA and PsaB bind P700, the primary electron donor of photosystem I (PSI), as well as the electron acceptors A0, A1 and FX. PSI is a plastocyanin cytochrome c6-ferredoxin oxidoreductase, converting photonic excitation into a charge separation, which transfers an electron from the donor P700 chlorophyll pair to the spectroscopically characterized acceptors A0, A1, FX, FA and FB in turn. Oxidized P700 is reduced on the lumenal side of the thylakoid membrane by plastocyanin or cytochrome c6                                        |
| <i>PilL</i>       | T   | CheA signal transduction histidine kinase                                                                                                                                                                                                                                                                                                                                                                                                                                                                                                            |
| <i>PsaJ</i>       | C   | May help in the organization of the PsaE and PsaF subunits (By similarity)                                                                                                                                                                                                                                                                                                                                                                                                                                                                           |
| <i>YfdZ</i>       | E   | Aminotransferase                                                                                                                                                                                                                                                                                                                                                                                                                                                                                                                                     |
| <i>OCAR_5339</i>  | S   | oxidoreductase                                                                                                                                                                                                                                                                                                                                                                                                                                                                                                                                       |
| <i>folE</i>       | H   | GTP cyclohydrolase I                                                                                                                                                                                                                                                                                                                                                                                                                                                                                                                                 |
| <i>mtnD</i>       | S   | Catalyzes 2 different reactions between oxygene and the acireductone 1,2-dihydroxy-3-keto-5-methylthiopentene (DHK-MTPene) depending upon the metal bound in the active site. Fe-containing acireductone dioxygenase (Fe-ARD) produces formate and 2-keto-4- methylthiobutyrate (KMTB), the alpha-ketoacid precursor of methionine in the methionine recycle pathway. Ni-containing acireductone dioxygenase (Ni-ARD) produces methylthiopropionate, carbon monoxide and formate, and does not lie on the methionine recycle pathway (By similarity) |
| <i>cheB</i>       | T   | catalyzes the demethylation of specific methylglutamate residues introduced into the chemoreceptors (methyl-accepting chemotaxis proteins) by CheR (By similarity)                                                                                                                                                                                                                                                                                                                                                                                   |
| <i>PDEN_1306</i>  | D   | Cobyrinic acid ac-diamide synthase                                                                                                                                                                                                                                                                                                                                                                                                                                                                                                                   |
| <i>ceaA</i>       | P   | efflux system protein                                                                                                                                                                                                                                                                                                                                                                                                                                                                                                                                |
| <i>AZL_008610</i> | S   | Phage protein Gp37/Gp68                                                                                                                                                                                                                                                                                                                                                                                                                                                                                                                              |
| <i>ssuD</i>       | S   | Monooxygenase                                                                                                                                                                                                                                                                                                                                                                                                                                                                                                                                        |
| <i>ndh</i>        | C   | FAD-dependent pyridine nucleotide-disulfide oxidoreductase                                                                                                                                                                                                                                                                                                                                                                                                                                                                                           |
| <i>gstA</i>       | O   | Glutathione S-transferase N-terminal domain protein                                                                                                                                                                                                                                                                                                                                                                                                                                                                                                  |
| <i>metX</i>       | E   | homoserine O-acetyltransferase                                                                                                                                                                                                                                                                                                                                                                                                                                                                                                                       |
| <i>mutT</i>       | F   | Nudix hydrolase                                                                                                                                                                                                                                                                                                                                                                                                                                                                                                                                      |
| <i>SCLAV_5486</i> | S   | Inherit from bactNOG: Cupin 2, conserved barrel domain protein                                                                                                                                                                                                                                                                                                                                                                                                                                                                                       |
| <i>BL01679</i>    | E   | SAM-dependent methyltransferase                                                                                                                                                                                                                                                                                                                                                                                                                                                                                                                      |
| <i>SCLAV_2440</i> | S   | ABC transporter                                                                                                                                                                                                                                                                                                                                                                                                                                                                                                                                      |
| <i>ycgL</i>       | S   | Predicted nucleotidyltransferase                                                                                                                                                                                                                                                                                                                                                                                                                                                                                                                     |
| <i>lon</i>        | O   | Inherit from bactNOG: ATP-dependent Lon protease                                                                                                                                                                                                                                                                                                                                                                                                                                                                                                     |
| <i>yaiS</i>       | S   | GlcNAc-PI de-N-acetylase                                                                                                                                                                                                                                                                                                                                                                                                                                                                                                                             |
| <i>rfbF</i>       | M   | Glucose-1-phosphate cytidyltransferase                                                                                                                                                                                                                                                                                                                                                                                                                                                                                                               |
| <i>umaA</i>       | M   | cyclopropane-fatty-acyl-phospholipid synthase                                                                                                                                                                                                                                                                                                                                                                                                                                                                                                        |
| <i>SSCG_04708</i> | S   | protein containing aminopeptidase domain                                                                                                                                                                                                                                                                                                                                                                                                                                                                                                             |
| <i>rfbC</i>       | M   | dTDP-4-dehydrorhamnose 3,5-epimerase                                                                                                                                                                                                                                                                                                                                                                                                                                                                                                                 |

## Supplementary material S6

**Table S5.** The genes present in the genome of the common ancestor of NSS and CRC but missing in the NSS ancestor.

| Gene Name          | COG  | Function                                                                                                                                                                                                                                                                                                        |
|--------------------|------|-----------------------------------------------------------------------------------------------------------------------------------------------------------------------------------------------------------------------------------------------------------------------------------------------------------------|
| <i>GLL1611</i>     | L    | Transposase                                                                                                                                                                                                                                                                                                     |
| <i>dnaB</i>        | L    | Replicative DNA helicase                                                                                                                                                                                                                                                                                        |
| <i>AVA_1381</i>    | L    | Transposase IS66                                                                                                                                                                                                                                                                                                |
| <i>NblA</i>        | S    | phycobilisome degradation protein                                                                                                                                                                                                                                                                               |
| <i>CheB2</i>       | T    | CheB methylesterase                                                                                                                                                                                                                                                                                             |
| <i>AppA</i>        | E    | Extracellular solute-binding protein, family 5                                                                                                                                                                                                                                                                  |
| <i>AqpZ</i>        | M    | Channel that permits osmotically driven movement of water in both directions. It is involved in the osmoregulation and in the maintenance of cell turgor during volume expansion in rapidly growing cells. It mediates rapid entry or exit of water in response to abrupt changes in osmolarity (By similarity) |
| <i>BMUL_4716</i>   | S    | ATP-binding protein                                                                                                                                                                                                                                                                                             |
| <i>gumM</i>        | M    | Glycosyl transferase WecB TagA CpsF                                                                                                                                                                                                                                                                             |
| <i>yvkB</i>        | K    | Transcriptional regulator, TetR family                                                                                                                                                                                                                                                                          |
| <i>spoT</i>        | K, T | HDc                                                                                                                                                                                                                                                                                                             |
| <i>igiC</i>        | Q    | Asp Glu hydantoin racemase                                                                                                                                                                                                                                                                                      |
| <i>lpcA</i>        | M    | Glycosyl transferase family 8                                                                                                                                                                                                                                                                                   |
| <i>wcaF</i>        | M    | Inherit from bactNOG: colanic acid biosynthesis acetyltransferase wcaF                                                                                                                                                                                                                                          |
| <i>SCLAV_1551</i>  | S    | Methyltransferase type 11                                                                                                                                                                                                                                                                                       |
| <i>HTH_0578</i>    | S    | Phosphatidylethanolamine-binding protein                                                                                                                                                                                                                                                                        |
| <i>mtnB</i>        | G    | Catalyzes the dehydration of methylthioribulose-1- phosphate (MTRu-1-P) into 2,3-diketo-5-methylthiopentyl-1- phosphate (DK-MTP-1-P) (By similarity)                                                                                                                                                            |
| <i>dmpI</i>        | S    | 4-oxalocrotonate tautomerase                                                                                                                                                                                                                                                                                    |
| BL05203            | E    | Amino acid permease                                                                                                                                                                                                                                                                                             |
| <i>PolB</i>        | L    | DNA polymerase                                                                                                                                                                                                                                                                                                  |
| <i>OCAR_6107</i>   | M    | Glycosyl transferases group 1                                                                                                                                                                                                                                                                                   |
| <i>rsgA</i>        | S    | May play a role in 30S ribosomal subunit biogenesis. Unusual circularly permuted GTPase that catalyzes rapid hydrolysis of GTP with a slow catalytic turnover (By similarity)                                                                                                                                   |
| <i>rbpD</i>        | S    | RNA-binding protein                                                                                                                                                                                                                                                                                             |
| <i>purM</i>        | F    | phosphoribosylaminoimidazole synthetase                                                                                                                                                                                                                                                                         |
| <i>bchE</i>        | C    | hopanoid biosynthesis associated radical SAM protein HpnJ                                                                                                                                                                                                                                                       |
| <i>ypfJ</i>        | S    | Putative neutral zinc metallopeptidase                                                                                                                                                                                                                                                                          |
| <i>tauB</i>        | P    | ABC transporter                                                                                                                                                                                                                                                                                                 |
| PPS                | G    | pyruvate phosphate dikinase PEP pyruvate-binding                                                                                                                                                                                                                                                                |
| <i>yccU</i>        | S    | CoA_binding                                                                                                                                                                                                                                                                                                     |
| <i>rplL</i>        | J    | Seems to be the binding site for several of the factors involved in protein synthesis and appears to be essential for accurate translation (By similarity)                                                                                                                                                      |
| <i>sbP</i>         | S    | 56kDa selenium binding protein (SBP56)                                                                                                                                                                                                                                                                          |
| <i>OCAR_5127</i>   | S    | Sulfite exporter TauE/SafE                                                                                                                                                                                                                                                                                      |
| <i>pyrE</i>        | F    | Catalyzes the transfer of a ribosyl phosphate group from 5-phosphoribose 1-diphosphate to orotate, leading to the formation of orotidine monophosphate (OMP) (By similarity)                                                                                                                                    |
| <i>modA</i>        | P    | ABC transporter, periplasmic molybdate-binding protein                                                                                                                                                                                                                                                          |
| <i>MC7420_3283</i> | T    | RecA-superfamily ATPases implicated in signal transduction                                                                                                                                                                                                                                                      |
| <i>SCLAV_3941</i>  | O    | PHB                                                                                                                                                                                                                                                                                                             |
| <i>cpsF</i>        | M    | Oligosaccharide biosynthesis protein Alg14 like                                                                                                                                                                                                                                                                 |
| <i>pssE</i>        | S    | Glycosyltransferase 28 domain protein                                                                                                                                                                                                                                                                           |



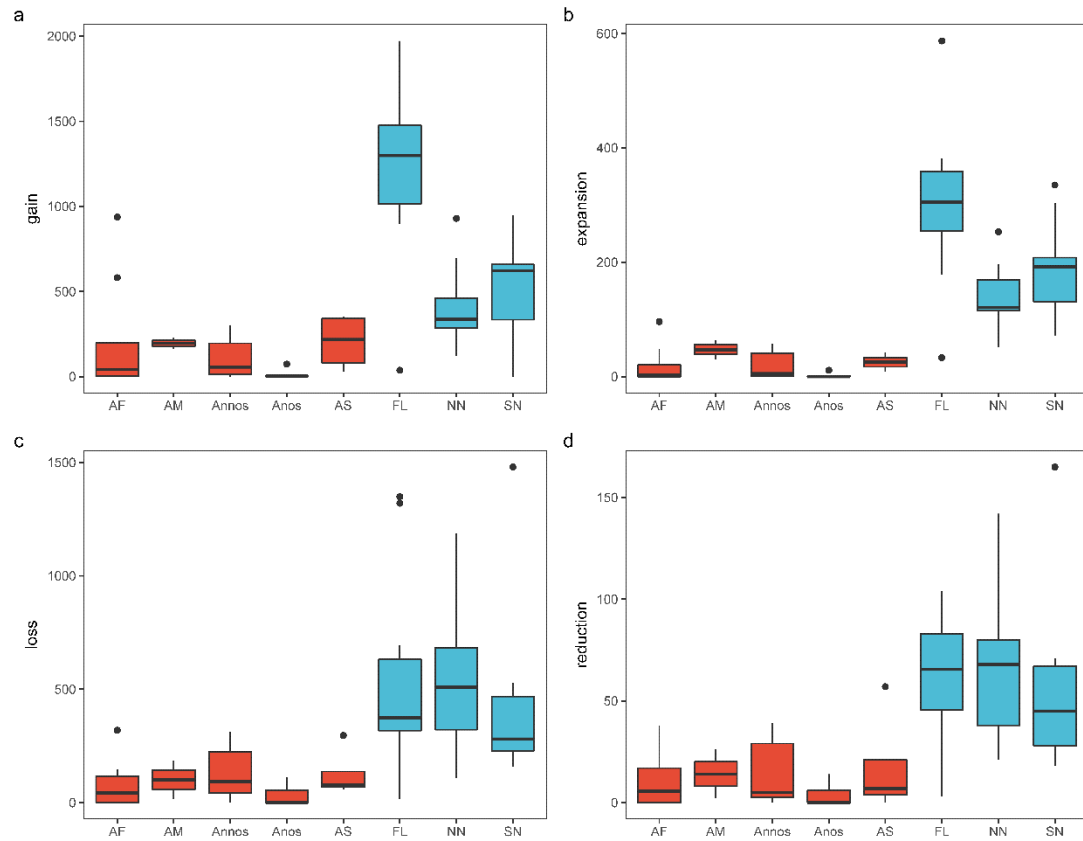

**Figure S2.** Evolutionary events happened along the phylogeny of *Nostoc* and other *Nostoc*-like species. **AF:** Ancestor of Free-living *Nostoc* **AM:** Ancestor of mixture clades **Annos:** Ancestor of Non-*Nostoc* species (ie., *Nostoc*-like species) **AS:** Ancestor of Real *Nostoc* species **FL:** Free-living *Nostoc* **NN:** Non-Symbiosis *Nostoc* **SN:** Symbiosis *Nostoc*.
